# Supplementary material for: Contribution of the lamellar morphology to the photocatalytic activity of alkaline-hydrothermally treated titania in rhodamine B photodegradation
Source: Royal Society of Chemistry journal article supplement (doi:10.1039/d2cp05098f), 2023-01-01
Supplement: d2cp05098f1.pdf [file d2cp05098f1.pdf]

## Electronic Supplementary Information

# Contribution of Lamellar Morphology on Photocatalytic Activity of Alkaline-Hydrothermally Treated Titania in Rhodamine B Photodegradation.

*Fry V. Steky<sup>a,b</sup>, Didi P. Benu<sup>a,b,c</sup>, Kemal L. H. Putra<sup>b</sup>, Muhamad N. Siddik<sup>b</sup>, Damar R. Adhika<sup>d,e</sup>, Rino R. Mukti<sup>b,d</sup>,  
Brian Yulianto<sup>d,e</sup>, Irma Mulyani<sup>b</sup>, Veinardi Suendo<sup>a,b,d</sup>*

<sup>a</sup>Doctoral Program of Chemistry, Faculty of Mathematics and Natural Sciences, of Department of Chemistry,  
Institut Teknologi Bandung, Bandung 40132, Indonesia.

<sup>b</sup>Division of Inorganic and Physical Chemistry, Faculty of Mathematics and Natural Sciences, Institut Teknologi  
Bandung, Jl. Ganesha No. 10, Bandung 40132 Indonesia.

<sup>c</sup>Department of Chemistry, Universitas Timor, Jl. Eltari, Kefamenanu 85613, Indonesia.

<sup>d</sup>Research Center for Nanosciences and Nanotechnology, Institut Teknologi Bandung, Jl. Ganesha No 10, Bandung  
40132, Indonesia.

<sup>e</sup>Engineering Physics Department, Faculty of Industrial Technology, Institut Teknologi Bandung, Jl. Ganesha No. 10,  
Bandung 40132 Indonesia.

## S1. Particle Size Distribution

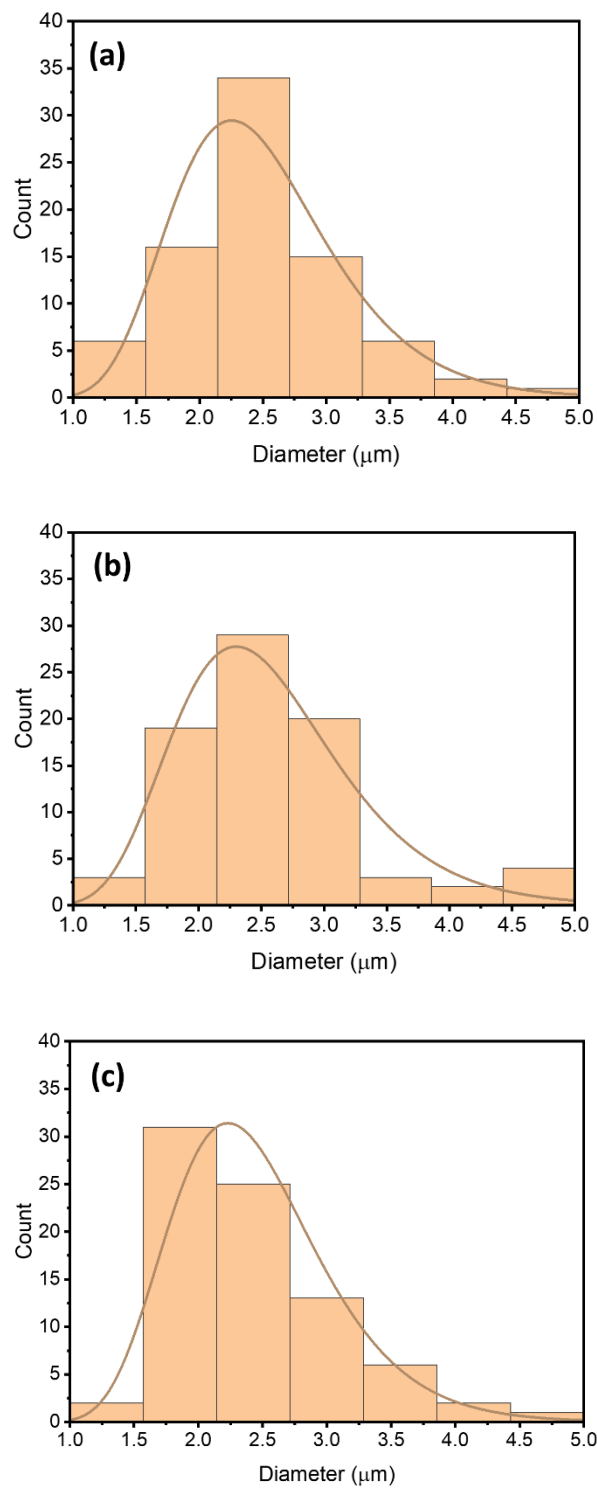

**Figure S1.** Particles Size Distribution of (a) S-AS, (b) S-HT, and (c) S-HT-500.

## S2. Particle Size Distribution

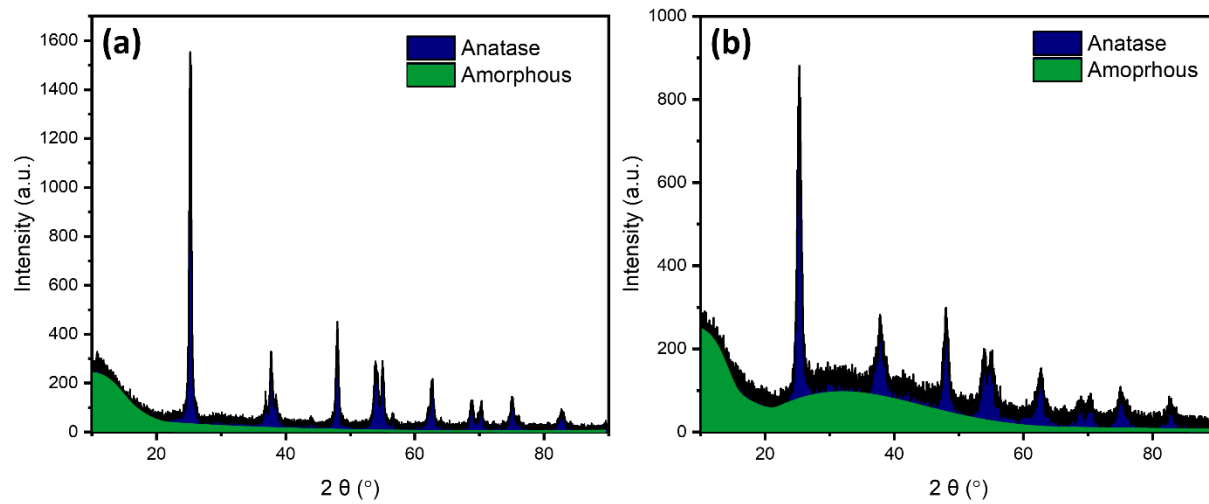

**Figure S2.** XRD pattern of (a) S-500 and (b) S-500-HT. The Blue area represents the anatase phase, while the green area represents the amorphous phase.

### S.3 Determining of {001} facet percentage

The interplanar spacing or  $d$ -spacing of the anatase crystal can be determined using Bragg's equation:

$$2d_{hkl} \sin \theta = n\lambda \quad (\text{S1})$$

$$\sin \theta = \frac{n\lambda}{2d_{hkl}} \quad (\text{S2})$$

The first-order reflection from (100) planes occurs at an angle given by:

$$\sin \theta (1^{st} \text{ order } 001) = \frac{1\lambda}{2d_{001}} \quad (\text{S3})$$

The second-order reflection from the same set of planes then occurs at an angle:

$$\sin \theta (2^{nd} \text{ order } 001) = \frac{2\lambda}{2d_{001}} \quad (\text{S4})$$

It is always referred to as the first-order reflection from (200) planes, i.e.

$$\sin \theta (1^{st} \text{ order } 002) = \frac{1\lambda}{2d_{002}} \quad (\text{S5})$$

Similarly, the third and fourth-order reflection from (001) planes is at an angle:

$$\sin \theta (3^{rd} \text{ order } 001) = \frac{3\lambda}{2d_{001}} \equiv \sin \theta (1^{st} \text{ order } 003) = \frac{1\lambda}{2d_{003}} \quad (\text{S6})$$

$$\sin \theta (4^{rd} \text{ order } 001) = \frac{4\lambda}{2d_{001}} \equiv \sin \theta (1^{st} \text{ order } 004) = \frac{1\lambda}{2d_{004}} \quad (\text{S7})$$

Note that the  $d_{001} = 2d_{002} = 3d_{003} = 4d_{004}$ , thus we can obtain the  $d_{001}$  value by knowing the  $d_{004}$  value. We have tabulated the calculation result of  $d_{hkl}$  spacing of anatase based on the XRD pattern in Table S3-1.

Table S3-1. The unit cell parameters of samples calculated using Bragg's equation

| <b>Samples</b> | <b><math>d_{004}</math></b> | <b><math>d_{200}</math></b> | <b><math>d_{001}</math></b> | <b><math>d_{100}</math></b> | <b><math>\theta</math></b> |
|----------------|-----------------------------|-----------------------------|-----------------------------|-----------------------------|----------------------------|
| S-HT-500       | 2.3783                      | 1.8921                      | 9.5132                      | 3.7842                      | 68.3°                      |
| S-500-HT       | 2.3764                      | 1.8919                      | 9.5056                      | 3.7838                      | 68.3°                      |
| A-HT-500       | 2.3758                      | 1.8934                      | 9.5032                      | 3.7868                      | 68.3°                      |
| A-500-HT       | 2.3799                      | 1.8899                      | 9.5196                      | 3.7798                      | 68.3°                      |
| P25 Degussa    | 2.3810                      | 1.8950                      | 9.5240                      | 3.7900                      | 68.3°                      |

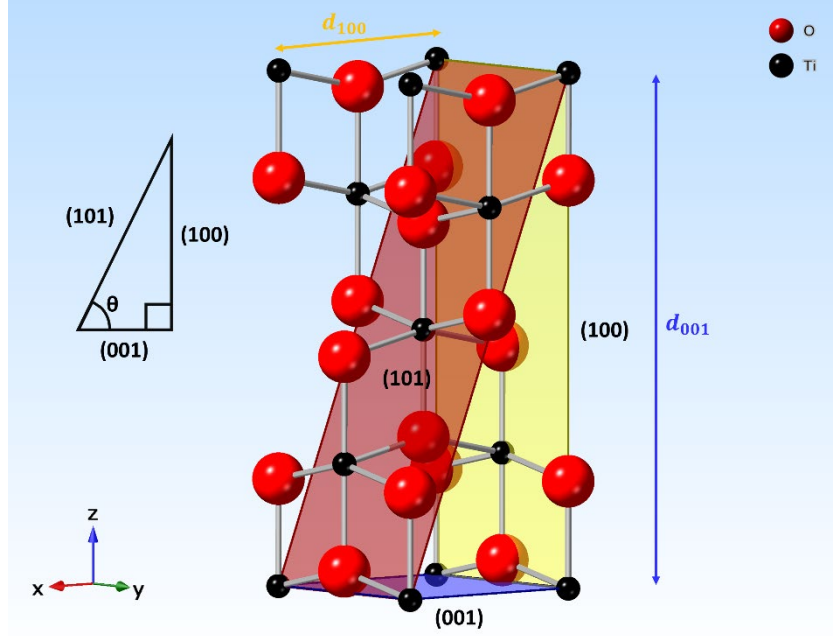

**Figure S3-1.** The schematic of the anatase unit cell.

The crystal system of anatase is tetragonal ( $I4_1/amd$ ) with unit cell  $a = b \neq c$ ;  $\alpha = \beta = \gamma = 90^\circ$ , where  $a = b = d_{100}$  and  $c = d_{001}$ . We know  $\theta$  is the angle between the (101) and (001) planes, as shown in Figure S3-1, where:

$$\theta = \tan^{-1} \frac{d_{001}}{d_{100}} \quad (\text{S8})$$

thus, using equation S8, we can calculate  $\theta$  for each sample as tabulated in Table S3-1.

Since the crystallite consists of several unit cells, thus the ratio of  $d_{100}$  to  $d_{001}$  is equal to the ratio of the average crystallite size along [100] direction ( $D_{100}$ ) to the average crystallite size along [001] direction ( $D_{001}$ ), which can be written as:

$$\theta = \tan^{-1} \frac{d_{001}}{d_{100}} = \tan^{-1} \frac{D_{001}}{D_{100}} \cong 68.3^\circ \quad (\text{S9})$$

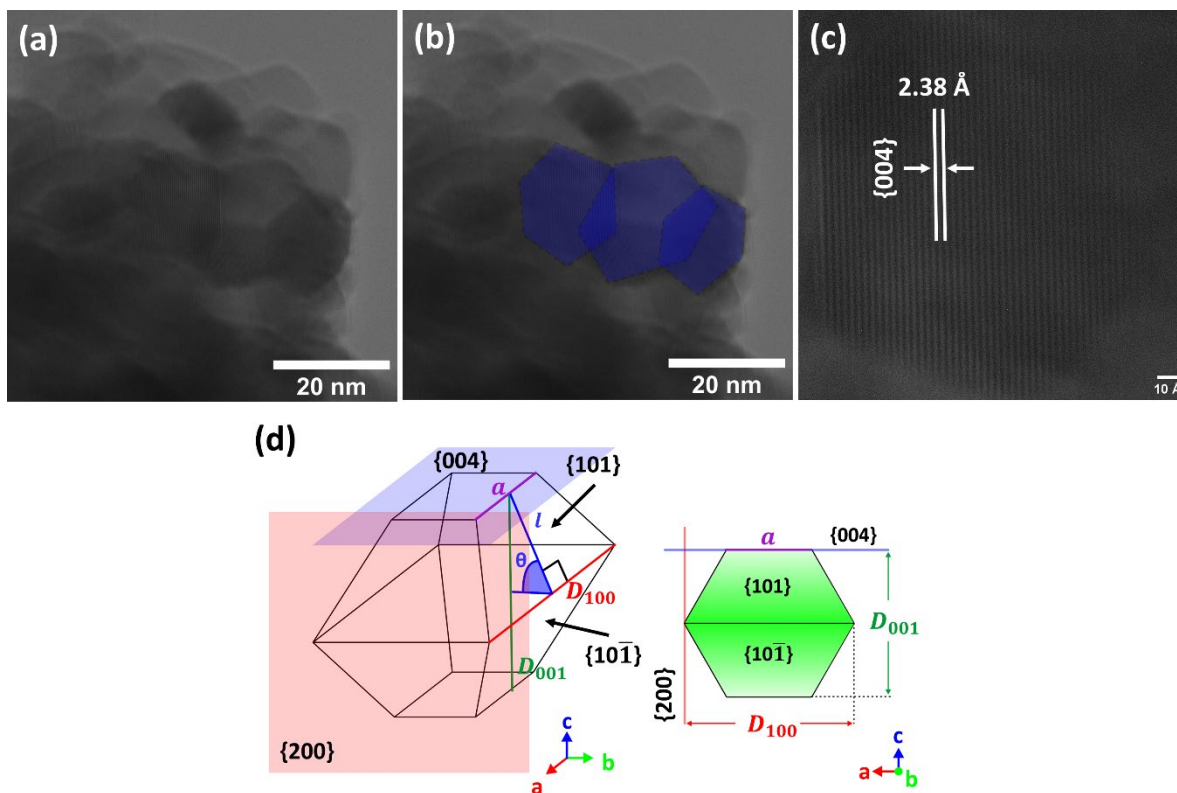

**Figure S3-2.** (a) HRTEM images of the calcined sample show the square–bipyramidal shape of crystallites. (b) Projected crystallites to {010} plane are depicted as blue hexagons and at higher magnification, (c) a hexagonal shaped crystallite shows vertical lattice fringes representing the {004} interplanar distance. (d) The geometric scheme of a truncated square–bipyramidal shaped anatase crystallite.

The percentage of {001} facet can be calculated by knowing the crystallite truncated length ( $a$ ). We use the geometry approach to calculate the  $a$  value since it has a relation with  $D_{100}$  and  $D_{001}$ . The average crystallite size ( $D_{hkl}$ ) calculated using the Scherrer equation:

$$D_{hkl} = \frac{K \times \lambda}{B_{hkl} \times \cos \theta_{hkl}} \quad (\text{S10})$$

Where  $D_{hkl}$  is the mean crystallite size in  $[hkl]$  direction,  $K$  is a dimensionless shape factor (in this case, we use  $K = 0.94$ ),  $\lambda$  is the source X-ray wavelength (in this case, we use  $\text{Cu } K_{\alpha} = 1.540 \text{ \AA}$ ),  $B_{hkl}$  is the line broadening at half the maximum intensity (FWHM) of  $(hkl)$  peak,  $\theta_{hkl}$  is the Bragg angle.

As shown in Figure S3-2, we can calculate the values of  $a$  and  $l$  using the following equations:

$$a = D_{100} - \frac{D_{001}}{\tan \theta} \quad (\text{S11})$$

$$l = \frac{D_{001}}{2 \sin \theta} \quad (\text{S12})$$

The percentage of {001} facet can be calculated by dividing the area of (001) plane to the crystallite total surface area:

$$A_{\{001\}} = a \times a = \left( D_{100} - \frac{D_{001}}{\tan \theta} \right)^2 \quad (\text{S13})$$

$$A_{\{101\}} = \left( \frac{D_{100} + a}{2} \right) \times l = \left( 2D_{100} - \frac{D_{001}}{\tan \theta} \right) \times \frac{D_{001}}{2 \sin \theta} \quad (\text{S14})$$

$$\% \{001\} \text{ facet} = \frac{\left( D_{100} - \frac{D_{001}}{\tan \theta} \right)^2}{\left( D_{100} - \frac{D_{001}}{\tan \theta} \right)^2 + \frac{2D_{001}}{\sin \theta} \left( 2D_{100} - \frac{D_{001}}{\tan \theta} \right)} \times 100 \% \quad (\text{S15})$$

## S4. The Rietveld refinement and the corresponding Williamson-Hall plot

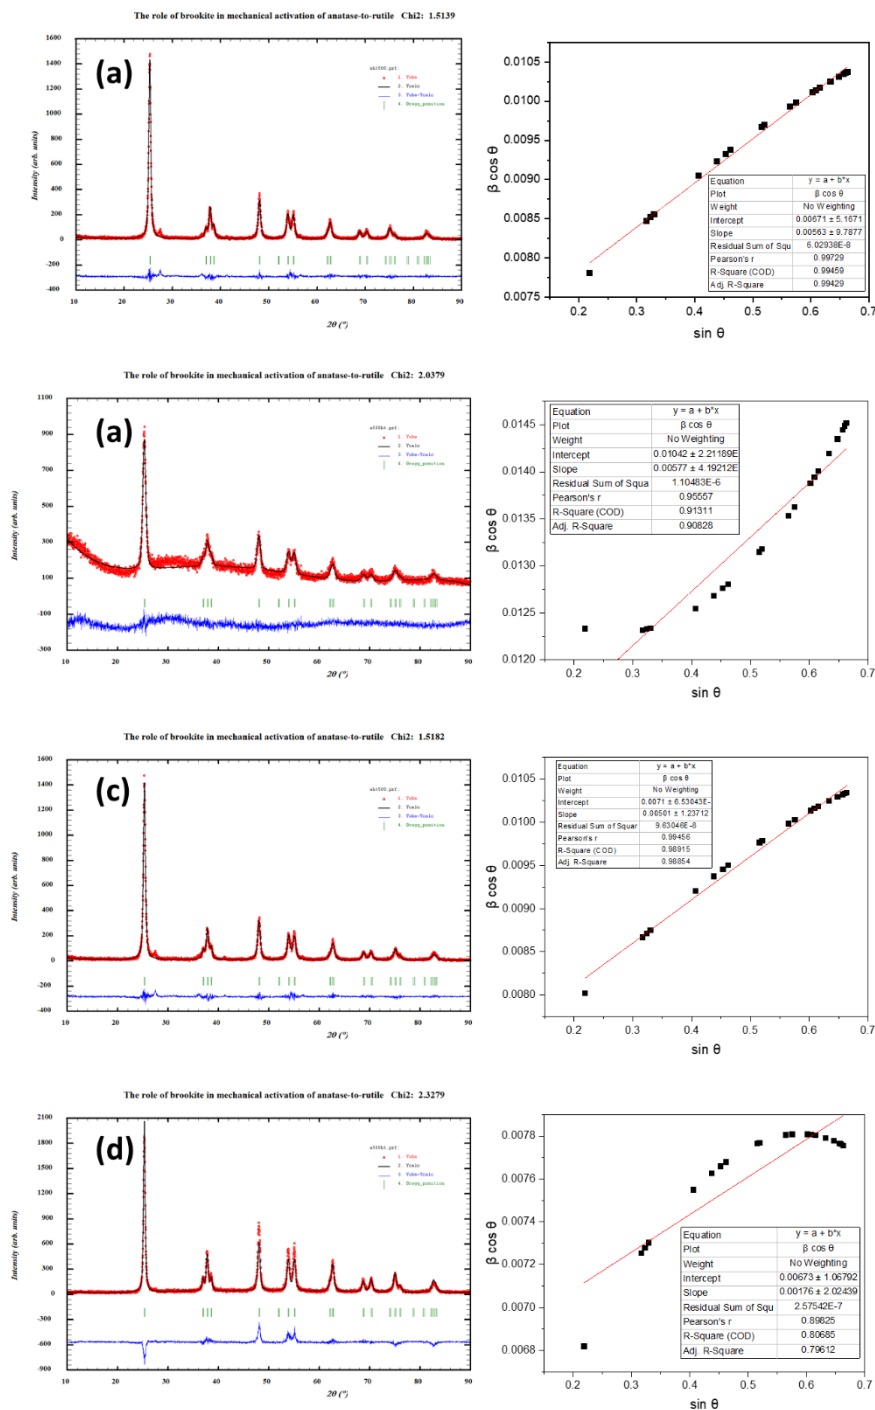

**Figure S4.** The Rietveld refinement results and the corresponding Williamson-Hall plot of (a) S-HT-500, (b) S-500-HT, (c) A-HT-500, and (d) A-500-HT.



## S5. N<sub>2</sub> physisorption results

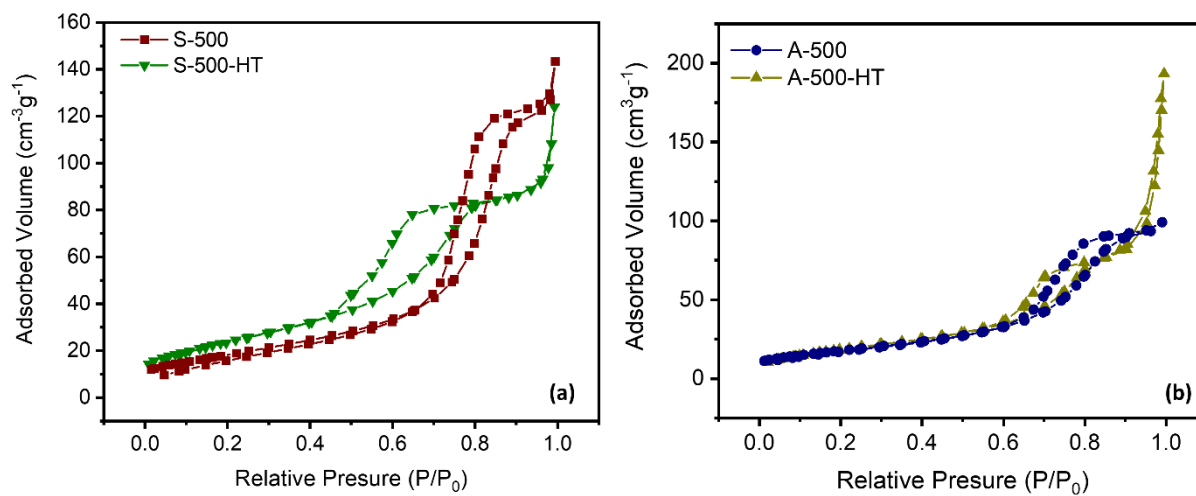

**Figure S5.** N<sub>2</sub> physisorption isotherm of (a) S-500 vs. S-500-HT and (b) A-500 vs. A-500-HT.

## S6. HRTEM images of each synthesized step

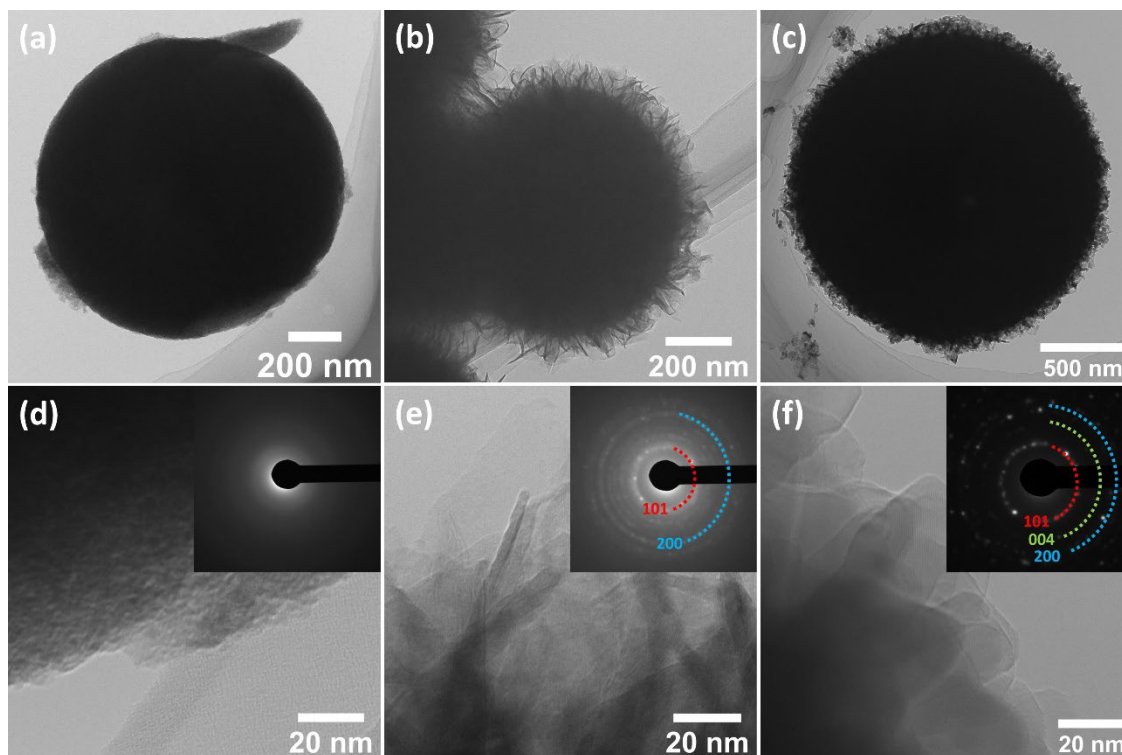

**Figure S6.** (a-c) TEM and (d-f) HRTEM images of samples: (a,d) as-synthesized, (b,e) hydrothermally-treated, and (c,f) calcined samples. The inset of (d-f) is the corresponding SAED pattern.

## S7. Photodegradation of Rhodamine B

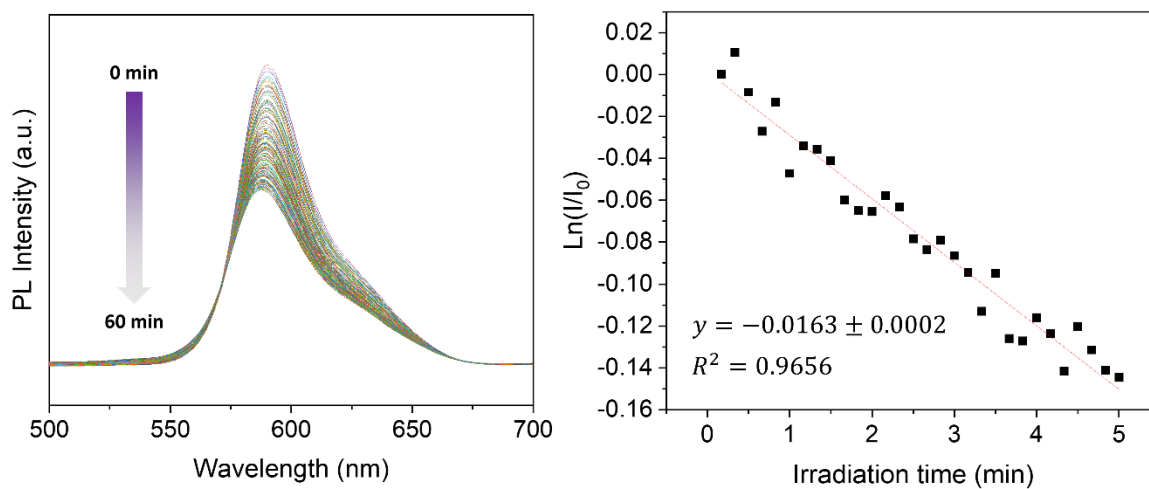

**Figure S7.** Evolution of PL spectra of rhodamine B with respect to the irradiation time and the corresponding first-order kinetic plots.
